# Supplementary material for: Youth-friendly health service in Ethiopia: Assessment of care friendliness and user’s satisfaction
Source: PubMed Central journal article supplement (PMC11251592; doi:10.1371/journal.pone.0307142), 2024-07-16
Supplement: pone.0307142.s002.pdf [file pone.0307142.s002.pdf]

**S1. Table. Measurement/scoring sheet/ for the five domains of care friendliness**

| <b>Domain</b>                  | <b>Characteristics/Questions</b>                                                                                                           | <b>Response</b> | <b>Score</b>                                                                |
|--------------------------------|--------------------------------------------------------------------------------------------------------------------------------------------|-----------------|-----------------------------------------------------------------------------|
| Equitable                      | Are procedures in place to ensure that no young people are excluded from services?                                                         | 0=No,<br>1=Yes  | Total “Yes” divided by total number of adolescent/youth clients interviewed |
| Absolute total score           |                                                                                                                                            | 0-1             | Total score                                                                 |
| Relative score (equity)        |                                                                                                                                            | 0 to 100%       | $\left(\frac{\text{Total score}}{1}\right) * 100$                           |
| Accessible                     | Is information and referrals provided about where young people can access other youth-friendly health or social services in the community? | 0=No,<br>1=Yes  | Total “Yes” divided by total number of adolescent/youth clients interviewed |
|                                | Have you found the waiting times too long before seeing the health-care providers?                                                         | 0=Yes,<br>1=No  | Total “No” divided by total number of adolescent/youth clients interviewed  |
|                                | Are the working days and working hours of the health facility convenient for you?                                                          | 0=No,<br>1=Yes  | Total “Yes” divided by total number of adolescent/youth clients interviewed |
|                                | Are services located in an area that is accessible to youth and safe for them to travel to?                                                | 0=No,<br>1=Yes  | Total “Yes” divided by total number of adolescent/youth clients interviewed |
|                                | Are services free of cost or affordable for young people?                                                                                  | 0=No,<br>1=Yes  | Total “Yes” divided by total number of adolescent/youth clients interviewed |
|                                | Are you able to access all of their health services in one visit?                                                                          | 0=No,<br>1=Yes  | Total “Yes” divided by total number of adolescent/youth clients interviewed |
|                                | Are there separate clinic hours or waiting areas just for young people?                                                                    | 0=No,<br>1=Yes  | Total “Yes” divided by total number of adolescent/youth clients interviewed |
|                                | Absolute total score                                                                                                                       |                 | 0-7                                                                         |
| Relative score (accessibility) |                                                                                                                                            | 0 to 100%       | $\left(\frac{\text{Total score}}{7}\right) * 100$                           |
| Appropriate                    | Does the site have posters, brochures and other IEC materials that target young                                                            | 0=No,<br>1=Yes  | Total “Yes” divided by total number of                                      |

|                                  |                                                                                                                                      |                |                                                                             |
|----------------------------------|--------------------------------------------------------------------------------------------------------------------------------------|----------------|-----------------------------------------------------------------------------|
|                                  | people, including information about their rights?                                                                                    |                | adolescent/youth clients interviewed                                        |
|                                  | Are the services advertised to young people in places where they congregate (e.g., schools, youth clubs, recreation centers, etc.)?  | 0=No,<br>1=Yes | Total “Yes” divided by total number of adolescent/youth clients interviewed |
|                                  | Is peer support or mentoring available?                                                                                              | 0=No,<br>1=Yes | Total “Yes” divided by total number of adolescent/youth clients interviewed |
|                                  | Are educational activities youth-friendly and address topics of interest to youth? (e.g., role plays, theatre, games, etc.)          | 0=No,<br>1=Yes | Total “Yes” divided by total number of adolescent/youth clients interviewed |
| Absolute total score             |                                                                                                                                      | 0-4            | Total score                                                                 |
| Relative score (appropriateness) |                                                                                                                                      | 0 to 100%      | $\left(\frac{\text{Total score}}{4}\right) * 100$                           |
| Acceptable                       | Are youth involved in program design, delivery, and evaluation?                                                                      | 0=No,<br>1=Yes | Total “Yes” divided by total number of adolescent/youth clients interviewed |
|                                  | Are young people greeted warmly upon entering?                                                                                       | 0=No,<br>1=Yes | Total “Yes” divided by total number of adolescent/youth clients interviewed |
|                                  | Are sessions conducted in an area that provides privacy so that nobody can see or hear the conversations taking place?               | 0=No,<br>1=Yes | Total “Yes” divided by total number of adolescent/youth clients interviewed |
|                                  | Do you think that your parents/guardians would be supportive of you coming to this health facility for reproductive health services? | 0=No,<br>1=Yes | Total “Yes” divided by total number of adolescent/youth clients interviewed |
|                                  | Do you believe that the information you shared with the health-care provider will be kept confidential?                              | 0=No,<br>1=Yes | Total “Yes” divided by total number of adolescent/youth clients interviewed |
| Absolute total score             |                                                                                                                                      | 0-5            | Total score                                                                 |
| Relative score (acceptability)   |                                                                                                                                      | 0 to 100%      | $\left(\frac{\text{Total score}}{5}\right) * 100$                           |
| Effective                        | Are condoms/other methods available to young people on-site?                                                                         | 0=No,<br>1=Yes | Total “Yes” divided by total number of                                      |

|                                |                                                                                                |                |                                                                             |
|--------------------------------|------------------------------------------------------------------------------------------------|----------------|-----------------------------------------------------------------------------|
|                                |                                                                                                |                | adolescent/youth clients interviewed                                        |
|                                | Competent health-care providers                                                                | 0=No,<br>1=Yes | Total “Yes” divided by total number of adolescent/youth clients interviewed |
|                                | Does the site have a youth-friendly strategy or action plan in place?                          | 0=No,<br>1=Yes | Total “Yes” divided by total number of adolescent/youth clients interviewed |
| Absolute total score           |                                                                                                | 0-3            | Total score                                                                 |
| Relative score (effectiveness) |                                                                                                | 0 to 100%      | $\left(\frac{\text{Total score}}{3}\right) * 100$                           |
| Global score /Friendliness     | $\left(\frac{\text{Total score for all domains}}{\text{total \# questions (20)}}\right) * 100$ |                |                                                                             |
